# Supplementary material
Source: publisher figshare collection journal article supplement (https://tandf.figshare.com/articles/dataset/_/22323391)
Supplement: Supplementary file 1 [file 1]

## Supplementary Tables:

**Supplementary Table no. I:** List of antibodies

| Sr. No | Antibody (Western Blot)       | Concentration | Make                               |
|--------|-------------------------------|---------------|------------------------------------|
| 1      | Rabbit anti-phospho- SAPK/JNK | 1µg/ml        | Cell Signaling<br>Technology (CST) |
| 2      | Rabbit anti-SAPK/JNK          | 1µg/ml        | Cell Signaling<br>Technology (CST) |
| 3      | Rabbit anti-phospho-p38-MAPK  | 1µg/ml        | Cell Signaling<br>Technology (CST) |
| 4      | Rabbit anti-p38               | 1µg/ml        | Cell Signaling<br>Technology (CST) |
| 7      | Rabbit anti-NF-κB             | 5µg/ml        | Cell Signaling<br>Technology (CST) |
| 8      | Rabbit anti-Map2a             | 5µg/ml        | Abcam, Bristol,<br>United Kingdom  |
| 9      | Rabbit anti-β-III Tubulin     | 1µg/ml        | Abcam, Bristol,<br>United Kingdom  |
| 10     | Anti-biotin HRP linked        | 1µg/ml        | Cell Signaling<br>Technology (CST) |
| 11     | Anti-Rabbit IgG, HRP linked   | 1µg/ml        | Cell Signaling<br>Technology (CST) |
| 12     | Rabbit anti-GAPDH             | 1ug/ml        | Cell Signaling<br>Technology (CST) |

**Supplementary Table no. II:** List of primers

| <b>Sr. No</b> | <b>Primer</b> | <b>Sequence</b>                                         | <b>Tm</b> | <b>Make</b>                |
|---------------|---------------|---------------------------------------------------------|-----------|----------------------------|
| 1             | <i>Gapdh</i>  | F: GGGGTCCCAGCTTAGGTTCA<br>R: CCAATACGGCCAAATCCGTT      | 60        | Bioserve, Boulder Colorado |
| 2             | <i>Tubb-3</i> | F: TTTTCGTCTCTAGCCGCGTG<br>R: GATGACCTCCCAGAACTTGGC     | 56.7      | Bioserve, Boulder Colorado |
| 3             | <i>Map2a</i>  | F: GTTCAGGCCCCACTCTCCTTC<br>R: AAGTCACCACTTGCTGCTGT     | 55.37     | Bioserve, Boulder Colorado |
| 4             | <i>Grp78</i>  | F: CCGAGTCTGCTTCGTGTCTC<br>R: ACACCGACGCAGGAATAGGT      | 56.40     | Bioserve, Boulder Colorado |
| 5             | <i>Chop</i>   | F: GTTATCTTGAGCCTAACACGTCG<br>R: GGACCAGGTTCTCTCTCCTCAG | 55.87     | Bioserve, Boulder Colorado |
| 6             | <i>Cox</i>    | TGGTCTACAAGACGCCACATC<br>GGCAGAACGACTCGGTTATCA          | 55.73     | Bioserve, Boulder Colorado |
| 7             | <i>Bax</i>    | CCAGGGTGGCTGGGAAGG<br>TGAGGACTCCAGCCACAAAG              | 57.19     | Bioserve, Boulder Colorado |
